# Supplementary material
Source: PubMed Central journal article supplement (PMC8673899)
Supplement: sj-pdf-2-ine-10.1177_15910199211009120.pdf [file sj-pdf-2-ine-10.1177_15910199211009120.pdf]

**Supplemental 2 Digital Content 1. Table**

**Clinical, Aneurysm and Intraparenchymal Hemorrhage Characteristics in DIPH and Control group**

| Patient No | HTN | Smoke | Presentation     | Aneurysm location | Aneurysm size | Pre-mRS | AA% inhibition | MA-AA | ADP% inhibition | MA-ADP | CYP2C19 Genotype | Aneurysm neck, mm | Size ratio | Aspect ratio | Post-Diastolic pressure | Post-Systolic pressure | Angiographic result  | Time hemorrhagic | Post-mRS | Location hemorrhagic | DIPH-related artery | Craniotomy | Follow up-mRS |
|------------|-----|-------|------------------|-------------------|---------------|---------|----------------|-------|-----------------|--------|------------------|-------------------|------------|--------------|-------------------------|------------------------|----------------------|------------------|----------|----------------------|---------------------|------------|---------------|
| DIPH 1     | Yes | No    | Incidental       | L C4              | 24.95         | 0       | 100            | 13.2  | 61.0            | 35.6   | 1*/1*            | 16.75             | 3.14       | 1.49         | 60                      | 120                    | Residual sac filling | 12 hours         | 6        | Left frontal lobe    | Left ACA            | Yes        | -             |
| DIPH 2     | Yes | Yes   | Headache         | R C6              | 13.44         | 1       | 98.5           | 18.5  | 56.0            | 44.2   | 1*/2*            | 12.03             | 3.60       | 1.12         | 80                      | 130                    | Neck remnant         | 20 hours         | 5        | Right temporal lobe  | Right MCA           | Yes        | 5             |
| DIPH 3     | No  | No    | Facial numbness  | R C6              | 33.31         | 1       | 100.0          | 7.3   | 7.1             | 57     | 2*/3*            | 17.90             | 3.28       | 1.86         | 75                      | 136                    | Residual sac filling | 2 days           | 4        | Right temporal lobe  | Right MCA           | No         | 1             |
| DIPH 4     | Yes | Yes   | Incidental       | R C5              | 10.69         | 0       | 95.5           | 10.6  | 19.0            | 51.9   | 1*/1*            | 11.78             | 3.54       | 0.91         | 90                      | 150                    | Neck remnant         | 12 hours         | 4        | Right temporal lobe  | Right MCA           | No         | 1             |
| DIPH 5     | No  | No    | Incidental       | R C6              | 7.31          | 0       | 96.5           | 16.3  | 66.0            | 48.5   | 1*/2*            | 5.00              | 1.13       | 1.46         | 76                      | 138                    | Neck remnant         | 4 days           | 4        | Right temporal lobe  | Right MCA           | No         | 1             |
| DIPH 6     | Yes | No    | Incidental       | R C6              | 17.15         | 0       | 94.5           | 15.3  | 59.0            | 52.6   | 1*/3*            | 13.58             | 2.72       | 1.26         | 82                      | 134                    | Neck remnant         | 7 hours          | 4        | Right frontal lobe   | Right ACA           | No         | 1             |
| Control 1  | No  | No    | Oculomotor palsy | R C4              | 20.40         | 1       | 96.7           | 18.0  | 18.2            | 62     | 1*/2*            | 6.31              | 1.46       | 3.07         | 72                      | 133                    | Residual sac filling | -                | 1        | -                    |                     | -          | 0             |
| Control 2  | Yes | Yes   | Oculomotor palsy | R C4              | 20.60         | 1       | 100.0          | 6.0   | 41.5            | 34     | 1*/1*            | 17.60             | 5.15       | 1.11         | 69                      | 142                    | Residual sac filling | -                | 1        | -                    |                     | -          | 0             |
| Control 3  | Yes | Yes   | Incidental       | L C6              | 13.80         | 0       | 61.6           | 10.0  | 96.6            | 31     | 1*/2*            | 6.15              | 1.38       | 2.24         | 88                      | 146                    | Neck remnant         | -                | 0        | -                    |                     | -          | 0             |
| Control 4  | Yes | Yes   | Tinnitus         | L C6              | 14.60         | 1       | 100.0          | 9.2   | 36.3            | 46.8   | 1*/1*            | 16.20             | 3.75       | 0.90         | 78                      | 126                    | Residual sac filling | -                | 0        | -                    |                     | -          | 0             |
| Control 5  | No  | Yes   | Incidental       | L C6              | 26.94         | 0       | 100.0          | 6.6   | 67.2            | 25.3   | 1*/2*            | 27.89             | 5.14       | 1.06         | 85                      | 150                    | Residual sac filling | -                | 0        | -                    |                     | -          | 0             |
| Control 6  | No  | Yes   | Decreased vision | R C6              | 28.00         | 1       | 94.2           | 13.1  | 34.6            | 36.5   | 1*/3*            | 19.80             | 4.97       | 1.16         | 62                      | 135                    | Residual sac filling | -                | 1        | -                    |                     | -          | 0             |
| Control 7  | Yes | Yes   | Headache         | R C4              | 9.50          | 1       | 90.7           | 10.0  | 34.0            | 42     | 1*/2*            | 8.94              | 2.06       | 1.06         | 69                      | 136                    | Neck remnant         | -                | 0        | -                    |                     | -          | 0             |
| Control 8  | No  | No    | Incidental       | LC4               | 10.60         | 0       | 93.2           | 11.3  | 41.2            | 52.1   | 1*/2*            | 12.90             | 3.64       | 0.90         | 77                      | 134                    | Neck remnant         | -                | 0        | -                    |                     | -          | 0             |
| Control 9  | No  | No    | Dizziness        | LC6               | 6.33          | 1       | 100.0          | 61.0  | 12.5            | 53     | 1*/2*            | 7.47              | 1.54       | 0.79         | 79                      | 140                    | Neck remnant         | -                | 0        | -                    |                     | -          | 0             |
| Control 10 | No  | No    | Decreased vision | L C6              | 6.93          | 1       | 100.0          | 12.6  | 23.2            | 33.5   | 2*/3*            | 3.43              | 0.90       | 1.96         | 82                      | 132                    | Neck remnant         | -                | 1        | -                    |                     | -          | 0             |
| Control 11 | No  | No    | Headache         | L C6              | 17.10         | 1       | 100.0          | 9.3   | 23.8            | 51.3   | 1*/3*            | 7.51              | 1.74       | 2.28         | 89                      | 128                    | Neck remnant         | -                | 0        | -                    |                     | -          | 0             |
| Control 12 | No  | No    | Incidental       | R C6              | 17.30         | 0       | 95.4           | 12.0  | 22.2            | 57     | 1*/2*            | 8.68              | 1.82       | 1.99         | 80                      | 130                    | Residual sac filling | -                | 0        | -                    |                     | -          | 0             |

\*The Bouthillier classification of internal carotid artery segments: C4 - cavernous; C5 - clinoid; C6 - ophthalmic. F, female; M, male; HTN, hypertension; L, left; R, right; Pre-, pre-operative; post, post-operative; mRS, modified Rankin scale; AA, arachidonic acid; MA, maximum amplitude; ADP, adenosine diphosphate
